# Supplementary material for: Characterization and Genomic Analysis of a Novel Lytic Phage DCp1 against Clostridium perfringens Biofilms
Source: MDPI journal article supplement (doi:10.3390/ijms24044191), 2023-02-20
Supplement: s1 [file s1]

Table S2. Antibiotic sensitivity of strains

| No. | Strain                       | oxacillin | penicillin G | erythrocin | spectinomycin | vancomycin | clindamycin | tetracycline | neomycin | ampicillin | kanamycin |
|-----|------------------------------|-----------|--------------|------------|---------------|------------|-------------|--------------|----------|------------|-----------|
| 1   | C. perfringens<br>BNCC125404 | S         | R            | I          | R             | S          | I           | R            | I        | S          | R         |
| 2   | C. perfringens D1            | S         | R            | I          | I             | S          | S           | R            | I        | I          | S         |
| 3   | C. perfringens D1-2          | R         | S            | S          | I             | I          | R           | S            | I        | I          | R         |
| 4   | C. perfringens D2            | S         | S            | I          | I             | R          | R           | I            | S        | S          | S         |
| 5   | C. perfringens D6            | S         | I            | S          | S             | R          | S           | S            | I        | I          | I         |
| 6   | C. perfringens D9-1          | R         | S            | I          | S             | S          | I           | R            | S        | I          | S         |
| 7   | C. perfringens D10           | I         | I            | S          | R             | S          | S           | I            | R        | S          | S         |
| 8   | C. perfringens D14           | R         | R            | R          | S             | S          | S           | I            | I        | I          | S         |
| 9   | C. perfringens D22           | I         | I            | S          | R             | R          | I           | R            | I        | R          | R         |
| 10  | C. perfringens D23           | S         | I            | I          | R             | R          | S           | S            | R        | I          | S         |
| 11  | C. perfringens D30           | S         | R            | I          | I             | I          | S           | S            | S        | S          | S         |
| 12  | C. perfringens D31           | R         | S            | S          | I             | I          | R           | S            | I        | I          | R         |
| 13  | C. perfringens CO1           | S         | S            | S          | R             | R          | S           | S            | R        | I          | I         |
| 14  | C. perfringens CO2           | I         | S            | S          | S             | I          | I           | R            | R        | I          | S         |
| 15  | C. perfringens CO3           | S         | R            | I          | I             | S          | S           | I            | I        | I          | S         |
| 16  | C. perfringens CO4           | S         | I            | I          | R             | R          | S           | R            | I        | S          | S         |
| 17  | C. perfringens CO5           | S         | I            | I          | R             | R          | R           | S            | R        | S          | I         |
| 18  | C. perfringens CO6           | S         | I            | I          | R             | R          | S           | I            | S        | R          | S         |
| 19  | C. perfringens CO7           | I         | I            | S          | R             | R          | I           | R            | I        | R          | R         |
| 20  | C. perfringens CO8           | S         | S            | I          | I             | I          | R           | R            | R        | I          | S         |
| 21  | C. perfringens CO9           | S         | I            | I          | I             | R          | S           | R            | R        | I          | I         |
| 22  | C. perfringens<br>CO10       | S         | I            | I          | R             | R          | R           | R            | R        | S          | S         |
| 23  | C. perfringens C1            | R         | S            | S          | I             | I          | R           | S            | I        | I          | R         |
| 24  | C. perfringens C2            | I         | I            | I          | S             | R          | R           | S            | S        | I          | R         |
| 25  | C. perfringens C3            | I         | I            | S          | R             | R          | S           | I            | I        | R          | S         |
| 26  | C. perfringens C10           | S         | I            | I          | R             | R          | S           | S            | S        | I          | I         |

|    |                     |   |   |   |   |   |   |   |   |   |   |
|----|---------------------|---|---|---|---|---|---|---|---|---|---|
| 27 | C. perfringens C28  | S | I | I | R | S | R | R | S | I | I |
| 28 | C. perfringens C30  | S | I | I | S | S | S | R | R | S | I |
| 29 | C. perfringens C38  | S | R | R | I | I | S | R | I | I | S |
| 30 | C. perfringens C99  | S | I | I | R | R | R | S | S | I | I |
| 31 | C. perfringens C425 | R | S | S | I | I | R | S | I | I | R |
| 32 | C. perfringens C718 | S | R | I | I | S | I | S | I | R | S |
| 33 | C. perfringens CT1  | I | I | S | R | R | I | R | I | R | R |
| 34 | C. perfringens CI1  | R | S | S | S | S | I | I | I | I | R |
| 35 | C. perfringens CQ21 | R | S | S | I | I | R | S | I | I | R |
| 36 | C. perfringens DO2  | R | S | S | S | I | I | I | S | R | R |
| 37 | C. perfringens DO8  | I | I | I | S | S | R | R | S | I | I |
| 38 | C. perfringens DO20 | S | R | R | R | I | I | I | I | S | S |
| 39 | C. perfringens DO21 | S | S | R | R | I | I | S | I | R | R |
| 40 | C. perfringens A1   | R | R | I | S | S | I | S | S | S | I |
| 41 | C. perfringens P1   | S | I | I | S | S | R | R | I | S | I |
| 42 | C. perfringens DE1  | S | R | R | I | I | R | S | S | I | I |
| 43 | C. perfringens F1   | S | R | R | I | I | S | S | I | R | S |
| 44 | C. perfringens M1   | I | I | S | R | R | I | R | I | R | R |
| 45 | C. perfringens BC1  | R | S | S | I | I | R | S | I | I | R |
| 46 | C. perfringens AL1  | I | I | I | S | R | R | S | S | I | R |
| 47 | C. perfringens WF1  | S | R | S | I | S | R | I | S | R | S |
| 48 | C. perfringens WH1  | S | S | S | S | I | I | R | R | S | S |
| 49 | C. perfringens P2   | S | R | I | I | S | R | R | I | I | I |
| 50 | C. perfringens JC35 | S | I | I | R | R | S | S | S | I | I |
| 51 | C. perfringens A12  | S | I | I | R | S | R | R | S | I | I |
| 52 | C. perfringens A13  | S | I | I | S | S | S | R | R | S | I |

|    |                    |   |   |   |   |   |   |   |   |   |   |
|----|--------------------|---|---|---|---|---|---|---|---|---|---|
| 53 | C. perfringens J12 | S | R | R | I | I | S | R | I | I | S |
| 54 | C. perfringens J16 | S | R | R | I | I | S | R | I | I | S |

---

“S”: sensitivity; “I”: medium sensitivity; “R”: resistant.
