# Supplementary material for: Characterization and Genomic Analysis of a Novel Lytic Phage DCp1 against Clostridium perfringens Biofilms
Source: MDPI journal article supplement (doi:10.3390/ijms24044191), 2023-02-20
Supplement: s1 [file s1]

**Table S3.** Functional grouping of predicted ORFs in phage DCp1 and their similarity to the database.

| ORFs  | start | stop | strand | Function                                                                | Scientific Name                    | E value | Per.Ident | Accession      |
|-------|-------|------|--------|-------------------------------------------------------------------------|------------------------------------|---------|-----------|----------------|
| ORF1  | 250   | 615  | 366    | hypothetical protein CPD7_25<br>[Clostridium phage CPD7]                | Clostridium phage CPD7             | 3E-76   | 92.56%    | AZF89493.1     |
| ORF2  | 634   | 882  | 249    | hypothetical protein vBCPqdyzP5_02<br>[Clostridium phage vB_CP_qdyz_P5] | Clostridium phage<br>vB_CP_qdyz_P5 | 1E-40   | 97.14%    | WAX22453.1     |
| ORF3  | 942   | 1292 | 351    | hypothetical protein vBCPqdyzP5_03<br>[Clostridium phage vB_CP_qdyz_P5] | Clostridium phage<br>vB_CP_qdyz_P5 | 3E-65   | 98.08%    | WAX22454.1     |
| ORF4  | 1295  | 1534 | 240    | hypothetical protein vBCPqdyzP5_04<br>[Clostridium phage vB_CP_qdyz_P5] | Clostridium phage<br>vB_CP_qdyz_P5 | 2E-30   | 94.94%    | WAX22455.1     |
| ORF5  | 1536  | 1862 | 327    | hypothetical protein vBCPqdyzP5_05<br>[Clostridium phage vB_CP_qdyz_P5] | Clostridium phage<br>vB_CP_qdyz_P5 | 2E-33   | 69.16%    | WAX22456.1     |
| ORF6  | 1862  | 2203 | 342    |                                                                         |                                    |         | None      |                |
| ORF7  | 2215  | 3846 | 1632   | BppU family phage baseplate upper<br>protein [Clostridium perfringens]  | Clostridium perfringens            | 1E-94   | 46.53%    | WP_243158902.1 |
| ORF8  | 3885  | 4913 | 1029   | morphogenesis protein C<br>[Clostridium phage vB_CP_qdyz_P5]            | Clostridium phage<br>vB_CP_qdyz_P5 | 0       | 99.71%    | WAX22459.1     |
| ORF9  | 5002  | 5901 | 900    | hypothetical protein vBCPqdyzP5_09<br>[Clostridium phage vB_CP_qdyz_P5] | Clostridium phage<br>vB_CP_qdyz_P5 | 0       | 98.33%    | WAX22460.1     |
| ORF10 | 5913  | 8309 | 2397   | DNA polymerase [Clostridium<br>phage vB_CP_qdyz_P5]                     | Clostridium phage<br>vB_CP_qdyz_P5 | 0       | 98.87%    | WAX22461.1     |
| ORF11 | 8391  | 8771 | 381    | hypothetical protein CPD7_15<br>[Clostridium phage CPD7]                | Clostridium phage CPD7             | 6E-75   | 96.77%    | AZF89483.1     |
| ORF12 | 9075  | 9380 | 306    | hypothetical protein vBCPqdyzP5_12<br>[Clostridium phage vB_CP_qdyz_P5] | Clostridium phage<br>vB_CP_qdyz_P5 | 1E-58   | 92.86%    | WAX22463.1     |
| ORF13 | 9400  | 9678 | 279    | hypothetical protein CPD7_13<br>[Clostridium phage CPD7]                | Clostridium phage CPD7             | 4E-57   | 97.83%    | AZF89481.1     |
| ORF14 | 10394 | 9720 | 675    | endolysin [Clostridium phage<br>vB_CP_qdyz_P5]                          | Clostridium phage<br>vB_CP_qdyz_P5 | 2E-163  | 97.77%    | WAX22466.1     |

|       |       |       |      |                                                                |                                 |        |        |                |
|-------|-------|-------|------|----------------------------------------------------------------|---------------------------------|--------|--------|----------------|
| ORF15 | 11261 | 10527 | 735  | collar protein [Clostridium phage vB_CP_qdyz_P5]               | Clostridium phage vB_CP_qdyz_P5 | 3E-173 | 99.59% | WAX22467.1     |
| ORF16 | 12174 | 11254 | 921  | collar protein [Clostridium phage vB_CP_qdyz_P5]               | Clostridium phage vB_CP_qdyz_P5 | 0      | 99.67% | WAX22468.1     |
| ORF17 | 12427 | 12167 | 261  | hypothetical protein [Clostridium phage vB_CP_qdyz_P5]         | Clostridium phage vB_CP_qdyz_P5 | 2E-53  | 98.84% | WAX22469.1     |
| ORF18 | 13735 | 12452 | 1284 | tail fibers protein [Clostridium phage vB_CP_qdyz_P5]          | Clostridium phage vB_CP_qdyz_P5 | 0      | 97.89% | WAX22470.1     |
| ORF19 | 15364 | 13739 | 1626 | lysozyme-peptidase [Clostridium phage vB_CP_qdyz_P5]           | Clostridium phage vB_CP_qdyz_P5 | 0      | 99.26% | WAX22471.1     |
| ORF20 | 16501 | 15416 | 1086 | hypothetical protein [Clostridium phage vB_CP_qdyz_P5]         | Clostridium phage vB_CP_qdyz_P5 | 0      | 98.61% | WAX22472.1     |
| ORF21 | 16779 | 16513 | 267  | hypothetical protein [Clostridium phage vB_CP_qdyz_P5]         | Clostridium phage vB_CP_qdyz_P5 | 4E-47  | 93.18% | WAX22473.1     |
| ORF22 | 17639 | 16992 | 648  | hypothetical protein [Clostridium phage vB_CP_qdyz_P5]         | Clostridium phage vB_CP_qdyz_P5 | 2E-134 | 90.99% | WAX22474.1     |
| ORF23 | 18019 | 17639 | 381  | hypothetical protein [Clostridium phage vB_CP_qdyz_P5]         | Clostridium phage vB_CP_qdyz_P5 | 9E-75  | 84.06% | WAX22475.1     |
| ORF24 | 18186 | 18031 | 156  | hypothetical protein HWB67_gp25 [Clostridium phage susfortuna] | Clostridium phage susfortuna    | 2E-21  | 98.04% | YP_009838564.1 |
| ORF25 | 18555 | 18415 | 141  |                                                                |                                 |        | None   |                |
